# Supplementary material
Source: publisher site journal article supplement (https://www.dovepress.com/article/387227)
Supplement: Supplementary file 1 [file get_supplementary_file.php]

Answer options

Strongly disagree : Disagree : Agree : Strongly Agree

I give my child the recommended amount of hydroxyurea each week.

I know the exact amount of hydroxyurea to give my child.

Sometimes my child does not get exactly the right amount of hydroxyurea.

I forget to give my child his or her hydroxyurea.

I skip doses of my child's hydroxyurea.

My child sometimes misses scheduled doses of hydroxyurea.

I have run out of my child's hydroxyurea because I did not have an active prescription.

Running out of hydroxyurea at home causes my child to take it irregularly.

My child has missed hydroxyurea doses because we have run out of the medicine.

Hydroxyurea is too expensive for my child to take regularly.

Treatment with hydroxyurea has been hard for our family to afford.

The cost of hydroxyurea is very stressful for our family.

I believe that hydroxyurea helps my child.

Hydroxyurea is an effective treatment for my child.

Hydroxyurea is a safe treatment for my child.

I understand how hydroxyurea works in my child's body.

I could explain to someone how hydroxyurea works to help my child's condition

I know how hydroxyurea works.

The lab work and appointments required for hydroxyurea are difficult.

Lab work and appointments for hydroxyurea treatment are very demanding or stressful.

Getting labs done for hydroxyurea treatment is hard.

I have difficulty getting my child's hydroxyurea from the pharmacy.

It is hard to find a nearby pharmacy that can provide my child's hydroxyurea.

Working with my pharmacy to get hydroxyurea is stressful.
